# Supplementary material
Source: publisher figshare collection journal article supplement (https://frontiersin.figshare.com/ndownloader/files/14413934)
Supplement: Supplementary file [file 14413934]

## Supplementary Material

# Natural selection equally supports the human tendencies in subordination and domination: a genome-wide study with *in silico* confirmation and *in vivo* validation in mice

Irina Chadaeva, Petr Ponomarenko, Dmitry Rasskazov, Ekaterina Sharypova, Elena Kashina, Maxim Kleshchev, Mikhail Ponomarenko\*, Vladimir Naumenko, Ludmila Savinkova, Nikolay Kolchanov, Ludmila Osadchuk, Alexandr Osadchuk

\* **Correspondence:** Mikhail Ponomarenko (pon@bionet.nsc.ru)

## Supplementary Method

### An estimate of binding affinity of TATA-binding protein for 70 bp regions in front of transcription start sites of human genes

The input data are the 70 bp DNA sequence  $\{s_{-70} \dots s_i \dots s_{-1}\}$ , where  $s_0$  is the transcription start site (TSS) and  $s_i \in \{a, c, g, t\}$ . We use the linear approximation for the three-step molecular mechanism of the TATA-binding protein (TBP) binding to the 70 bp region of the human gene promoters (Ponomarenko et al., 2008; Delgadillo et al., 2009). This mechanism can be described as follows: (i) TBP slides along DNA  $\leftrightarrow$  (ii) TBP stops at a probable TBP-binding site  $\leftrightarrow$  TBP–DNA complex is fixed by DNA bending at a right angle, i.e.,

$$-\ln(K_D) = 10.9 - 0.2 \{ \ln(K_{SLIDE}) + \ln(K_{STOP}) + \ln(K_{BEND}) \}, \quad (1)$$

where 10.9 (ln units) is nonspecific TBP–DNA affinity ( $10^{-5}$  M);  $-\ln(K_{STOP})$  is calculated using Bucher's matrix,  $W_{i,s(i)}$  is weight of nucleotide  $s(i)$  at the  $i$ th position of the TBP-binding site (Bucher, 1990):

$$\ln(K_{STOP}) = \max_{(+),(-)} \max_{DNA \text{ chains}} \left\{ \sum_{j=-1}^{13} w_{j;s_{i+j}} \right\}; \quad (2)$$

$-\ln(K_{SLIDE})$  is calculated using the abundance  $[TA]$  of dinucleotide TA and  $\mu$ -value of the minor groove width of the DNA helix (Karas et al., 1996), namely:

$$-\ln(K_{SLIDE}) = \text{MEAN}_{15bp} \{ 0.8[TA] + 3.4\mu + 35.1 \}; \quad (3)$$

$-\ln(K_{BEND})$  is calculated using the means for both DNA strands of the TBP-binding site at the maximal score value of Eq. (2), as follows:

$$-\ln(K_{BEND}) = \text{MEAN}_{TATA\text{-}box} \{ 0.9[TA, AA, TG, AG] + 2.5[TA, TC, TG] + 14.4 \}. \quad (4)$$

Using all the possible substitutions,  $s_j \rightarrow \xi$ , at each position  $j$  within the 26-bp DNA window scanning the 70 bp DNA under study, we estimated the standard deviation of the  $-\ln[K_D]$  estimates (Eq. 1) as

$$\delta = [(\sum_{1 \leq i \leq 26} \sum_{\xi \in \{a,c,g,t\}} [\ln(K_D(\{s_{i-13} \dots \xi \dots s_{i+12}\}) / K_D(\{s_{i-13} \dots s_{i+j} \dots s_{i+12}\}))^2]) / (3 \cdot 26)]^{1/2} \quad (5)$$

## Supplementary Material

Applying Eqs. (1–5) to both minor (min) and ancestral (wt) alleles of the DNA being studied, we calculated  $(-\ln(K_D^{(\min)}) \pm \delta_{(\min)})$  and  $(-\ln(K_D^{(wt)}) \pm \delta_{(wt)})$ , respectively, and, after that, computed Fisher's Z-score:

$$Z = \text{abs}[\ln(K_D^{(\min)})/K_D^{(wt)}]/[\delta_{(\min)}^2 + \delta_{(wt)}^2]^{1/2}. \quad (6)$$

Next, package R (Waardenberg et al., 2015) transforms this Z-score value into a p value, i.e., the probability of the hypothesis “ $H_0: K_D^{(\text{mut})} \neq K_D^{(\text{wt})}$ ”. At this statistically significant level  $p > 0.95$ , we made the final decision:

**IF** {*INEQUALITY* “ $-\ln(K_D^{(\min)}) > -\ln(K_D^{(wt)})$ ” is statistically significant},  
**THEN** {*DECISION* is “the minor allele of the given gene is overexpressed relative to the ancestral one”};  
**ELSE** [**IF** {*INEQUALITY* “ $-\ln(K_D^{(\min)}) < -\ln(K_D^{(wt)})$ ” is statistically significant},  
**THEN** {*DECISION* is “the minor allele of this gene is underexpressed relative to the ancestral one”},]  
**OTHERWISE** {*DECISION* is “alteration of the expression of this gene is insignificant”}.

This DECISION is the third line of textbox “Result” of our Web service SNP\_TATA\_Comparator<sup>1</sup>.

## References

- Bucher, P. (1990). Weight matrix descriptions of four eukaryotic RNA polymerase II promoter elements derived from 502 unrelated promoter sequences. *J Mol Biol.* **212**, 563-578. doi:10.1016/0022-2836(90)90223-9
- Delgadillo, R.F., Whittington, J.E., Parkhurst, L.K., and Parkhurst, L.J. (2009). The TATA-binding protein core domain in solution variably bends TATA sequences via a three-step binding mechanism. *Biochemistry.* **48**, 1801-1809. doi:10.1021/bi8018724
- Karas, H., Knuppel, R., Schulz, W., Sklenar, H., and Wingender, E. (1996). Combining structural analysis of DNA with search routines for the detection of transcription regulatory elements. *Comput Appl Biosci.* **12**, 441-446.
- Ponomarenko, P.M., Savinkova, L.K., Drachkova, I.A., Lysova, M.V., Arshinova, T.V., Ponomarenko, M.P., and Kolchanov, N.A. (2008). A step-by-step model of TBP/TATA box binding allows predicting human hereditary diseases by single nucleotide polymorphism. *Dokl Biochem Biophys.* **419**, 88-92. doi:10.1134/S1607672908020117
- Waardenberg, A.J., Basset, S.D., Bouveret, R., and Harvey, R.P. (2015). CompGO: an R package for comparing and visualizing Gene Ontology enrichment differences between DNA binding experiments. *BMC Bioinformatics.* **16**:275. doi:10.1186/s12859-015-0701-2.

---

<sup>1</sup><http://beehive.bionet.nsc.ru/cgi-bin/mgs/tatascan/start.pl>
